# Supplementary material for: Defective Proinsulin Handling Modulates the MHC I Bound Peptidome and Activates the Inflammasome in β-Cells
Source: MDPI journal article supplement (doi:10.3390/biomedicines10040814), 2022-03-30
Supplement: s1 [file s1]

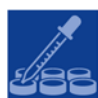**Table S1.** List of chemicals and antibodies used for experimental work related to this manuscript.

| Reagent                           | Commercial vendor, Cat#                                        |
|-----------------------------------|----------------------------------------------------------------|
| Ethanol                           | Ajax Finechem, cat. no. AJA214                                 |
| Optima water                      | Thermo Fisher Scientific, cat. no. FSBW6-4                     |
| Methanol                          | Merck Millipore, cat. no. 1.06018.4000                         |
| Acetonitrile                      | Thermo Fisher Scientific, cat. no. FSBA955-4                   |
| Formic acid                       | Sigma-Aldrich, cat. no. 14265-1ML                              |
| Acetic acid                       | Sigma-Aldrich, cat. no. 33209-1L-GL                            |
| Igepal CA-630                     | Sigma-Aldrich, cat. no. I8896                                  |
| Tris                              | Astral Scientific, cat. no. BIO3094T                           |
| Antibodies                        |                                                                |
| Anti-rabbit NLRP1                 | Cell signaling, cat. no. 4990S, dilution = 1:2,000             |
| Anti-rat GRP94                    | ThermoFisher Scientific, cat. no. MA3-016, dilution = 1:10,000 |
| Anti-mouse proinsulin             | Cell Signaling, cat. no. 8138S, dilution = 1:5000              |
| Anti-mouse tubulin                | Sigma, cat. no. T6074, dilution = 1:10,000                     |
| Anti-mouse I $\kappa$ B- $\alpha$ | Thermo Fisher scientific, cat. no. 40903, dilution = 1:1,000   |
| Recombinant Anti-IL-1 $\beta$     | Abcam, cat. no. ab283818, dilution = 1:2,000                   |
| Anti-rat                          | Abcam, cat. no. ab6734, dilution = 1:10,000                    |
| Anti-rabbit                       | Cell signaling, cat. no. 7074S, dilution = 1:10,000            |
| Anti-mouse                        | Cell signaling, cat. no. 7076S, dilution = 1:10,000            |

**Table S2.** List of peptides from heavy chain fraction digestion of INS-1E cells. The peptides map to RT1.A (class Ia) region of RT1 system in *Rattus norvegicus*.

| Peptides obtained from tryptic digest of RT1.A heavy chain                                                    | Uniprot Accession for detected peptides                                                                                                                           | Protein description                                                                                                                                                                                                                |
|---------------------------------------------------------------------------------------------------------------|-------------------------------------------------------------------------------------------------------------------------------------------------------------------|------------------------------------------------------------------------------------------------------------------------------------------------------------------------------------------------------------------------------------|
| YSDAENPR<br>WASVVPLGK<br>WEPSPSTDSNLLLLFLELWQFL<br>GYEQHAYDGR<br>DYIALNEDLK<br>VEHEGLPEPLSQR<br>TWAVADFAAWITR | P15978 HA11_RAT<br>P15978 HA11_RAT:P16391 HA12_RAT<br>P15978 HA11_RAT<br>P15978 HA11_RAT<br>P15978 HA11_RAT:P16391 HA12_RAT<br>P15978 HA11_RAT<br>P15978 HA11_RAT | Class I histocompatibility antigen Non-RT1.A alpha-1 chain OS= <i>Rattus norvegicus</i> OX=10116 GN=RT1-Aw2 PE=1 SV=1<br><br>RT1 class I histocompatibility antigen AA alpha chain OS= <i>Rattus norvegicus</i> OX=10116 PE=1 SV=2 |

**Table S3.** List of RT1.A-bound peptides from individual replicates of INS-1E cells under tested conditions.**Table S4.** List of peptides combined per condition for all groups.**Table S5.** List of source proteins for RT1.A bound peptides for all tested groups.**Table S6.** List of peptides with NNAlign predicted score and percentile rank for INS-1E cells under tested conditions.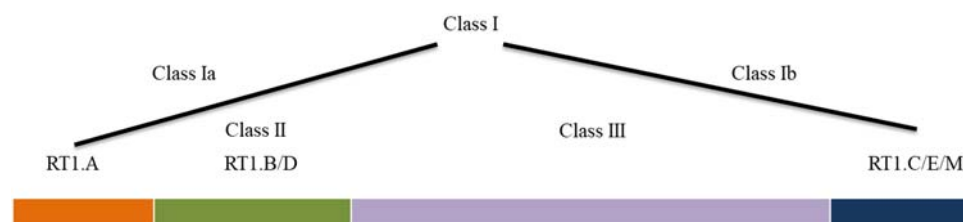**Figure S1.** General genomic organization of RT1 system in rats. Localized on chromosome 20, the RT1 system has 4 main regions. The RT1.A is the class Ia region. The second region RT1.B/D includes class II genes. Class III contains non-MHC genes. Finally, the class Ib is represented by RT1.C/E/M.

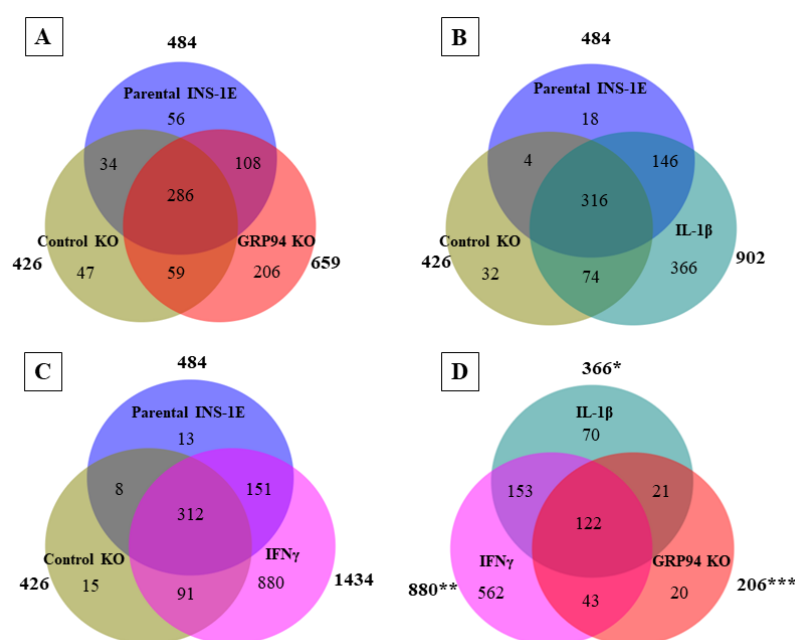

**Figure S2.** Venn diagrams showing number of source proteins for RT1.A. A eluted peptides distinct or overlapping between (A) Parental INS-1E, control KO & GRP94 KO and (B) Parental INS-1E, control KO & IL-1β exposure (15 pg/ml for 24 hours) (C) Parental INS-1E, control KO & IFNγ exposure (10 ng/ml for 24 hours) and (D) RT1.A contributing proteins exclusive for IL-1β, IFNγ exposed and GRP94 KO INS-1E groups.  $n = 2$  for all except GRP94 KO where  $n = 4$ . \* = IL-1β group proteins excluding parental INS-1E and control KO clone; \*\* = IFNγ group proteins excluding parental INS-1E and control KO clone; \*\*\* = GRP94 KO group proteins excluding parental INS-1E and control KO clone.

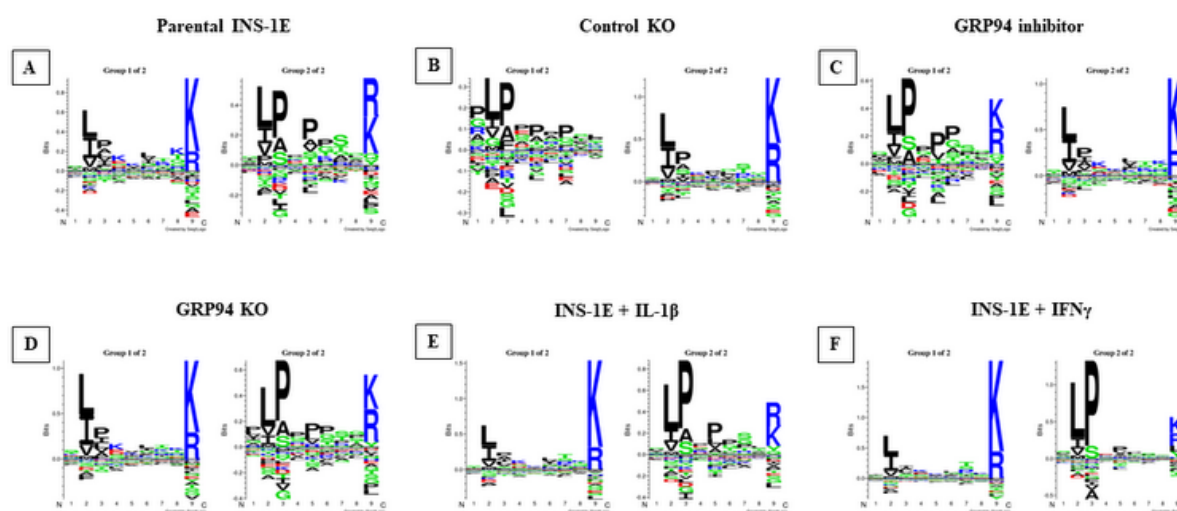

**Figure S3.** Gibbscluster analysis for RT1.A-bound peptides in INS-1E cells under tested conditions. (A) parental INS-1E (B) control GRP94 KO clone (C) INS-1E treated with GRP94 inhibitor (20 μM for 24 hours) (D) GRP94 KO INS-1E clone (E) IL-1β exposure (15 pg/ml for 24 hours) and (F) IFNγ exposure (10 ng/ml for 24 hours).  $n = 2$  for all except GRP94 KO where  $n = 4$ .

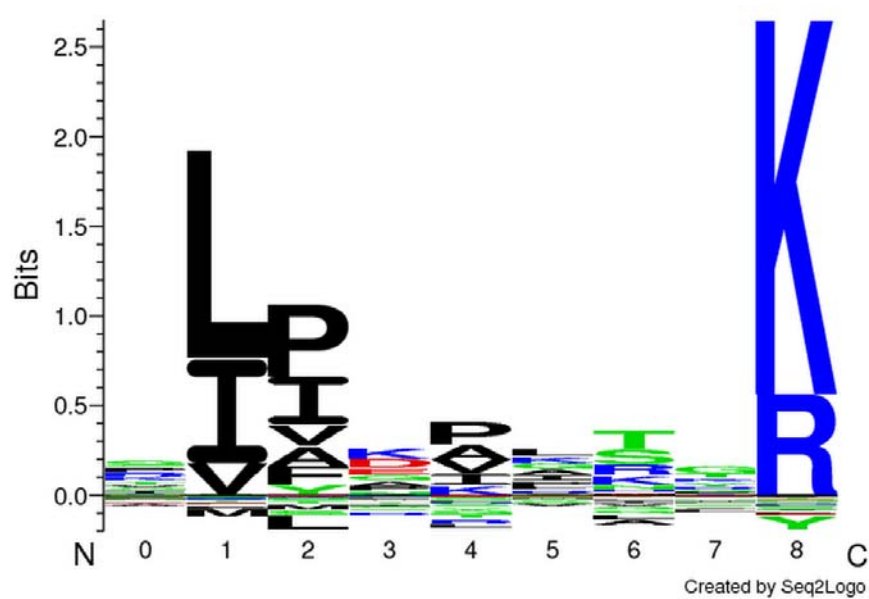

**Figure S4.** NNAlign binding motif for trained model against INS-1E peptides. The model was trained against RT1.A-bound and random natural peptides.
